# Supplementary material for: Application of a three dimensional polyethyleneimine functionalized graphene oxide aerogel as an adsorbent for the determination of phytohormones in ginseng
Source: Royal Society of Chemistry journal article supplement (doi:10.1039/d3ay01368e), 2023-01-01
Supplement: d3ay01368e1.pdf [file d3ay01368e1.pdf]

### Supplemental information

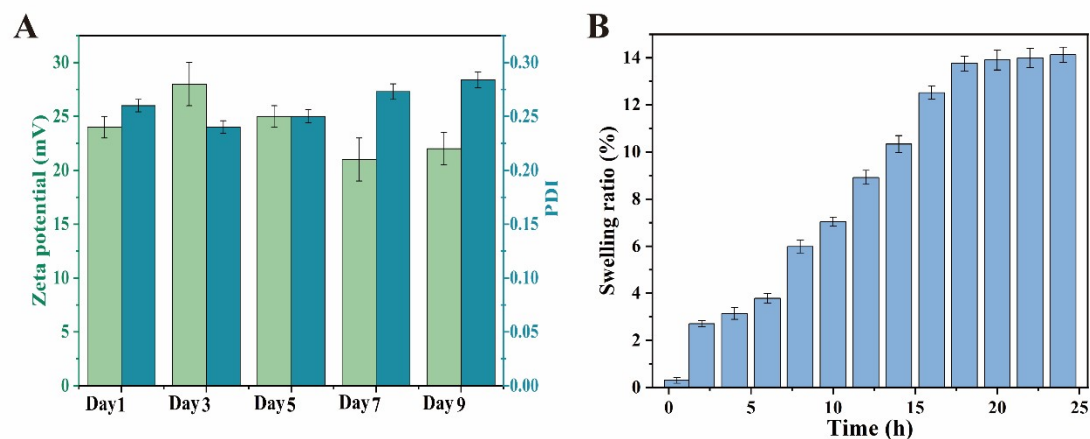

Fig.S1 Evaluation of colloidal stability of the PEI-AGO. (A) Zeta potential and PDI value of PEI-GO sample. (B) Swelling rate of the PEI-AGO.

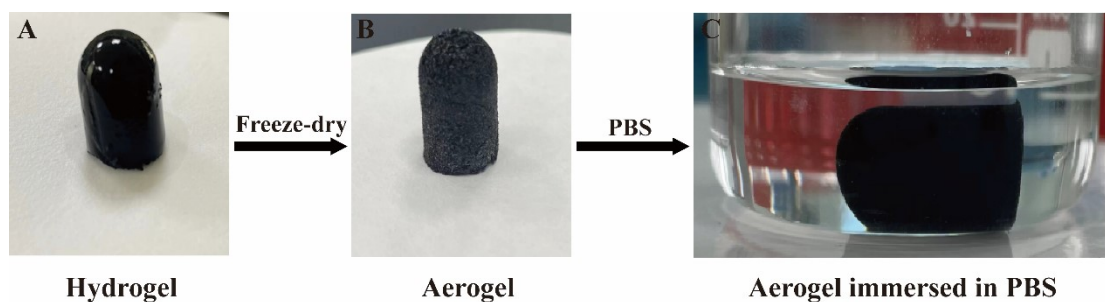

Fig.S2 Transformation of the composites in forms of hydrogel (A), aerogel (B) and aerogel immersed in PBS (C).
